# The Virulence Index: A Metric for Quantitative Analysis of Phage Virulence

1 **Zachary Storms**

2 Chemical and Materials Engineering, University of Alberta,  
3 Edmonton, AB, Canada  
4 [zstorms@ualberta.ca](mailto:zstorms@ualberta.ca)

5

6 **Matthew R. Teel**

7 Chemical and Materials Engineering, University of Alberta,  
8 Edmonton, AB, Canada  
9 [teel@ualberta.ca](mailto:teel@ualberta.ca)

10

11 **Kevin Mercurio**

12 Chemical and Materials Engineering, University of Alberta,  
13 Edmonton, AB, Canada  
14 [kmerc065@uottawa.ca](mailto:kmerc065@uottawa.ca)

15

16 **Dominic Sauvageau**\*

17 Chemical and Materials Engineering, University of Alberta,  
18 Edmonton, AB, Canada  
19 [dominic.sauvageau@ualberta.ca](mailto:dominic.sauvageau@ualberta.ca)  
20 1-780-492-8092

21

22 **\* Correspondence:**

23 Dominic Sauvageau  
24 [dominic.sauvageau@ualberta.ca](mailto:dominic.sauvageau@ualberta.ca)

25

26 **Running Title:** Phage Virulence Index

27

28 **Keywords:** bacteriophage infection, bacterial reduction curve, comparative virulence, virulence  
29 quantification, quality control, high-throughput analysis.

30 **Authors Confirmation Statement**

31 ZS and DS designed experiments. ZS, MRT, and KM performed experiments and analyzed data. ZS,  
32 MRT, and DS developed virulence metrics. ZS, MRT, and DS wrote the manuscript.

33

34 **Author Disclosure Statement**

35 No competing financial interests exist.

36

## 37 Abstract

38 **Background:** One of the main challenges in developing phage therapy and manufacturing phage  
39 products is the reliable evaluation of their efficacy, performance and quality. Since phage virulence is  
40 intrinsically difficult to fully capture, researchers have turned to rapid but partially inadequate  
41 methods for its evaluation.

42 **Materials and Methods:** The present study demonstrates a standardized, quantitative method to  
43 assess phage virulence based on three parameters: the Virulence Index ( $V_P$ ) – quantifying the  
44 virulence of a phage against a host, the local virulence ( $v_i$ ) – assessing killing potential at given  
45 MOIs, and  $MV_{50}$  – the MOI at which the phage achieves 50% of its maximum theoretical virulence.  
46 This was shown through comparative analysis of the virulence of phages T4, T5 and T7.

47 **Results:** Under the conditions tested, phage T7 displayed the highest virulence, followed by phage  
48 T4 and, finally, phage T5. The impact of parameters such as temperature and medium composition  
49 on virulence was shown for each phage. The use of the method to evaluate the virulence of  
50 combinations of phages – e.g. for cocktail formulation – is also shown with phages T5 and T7.

51 **Conclusions:** The method presented provides a platform for high-throughput quantitative assessment  
52 of phage virulence and quality control of phage products. It can also be applied to phage screening,  
53 evaluation of phage strains, phage mutants, infection conditions and/or the susceptibility of host  
54 strains, and the formulation of phage cocktails.

55

## 56 Introduction

57 Despite the significant impact bacteriophages (phages) have had in understanding genetic and  
58 gene regulation<sup>1</sup>, and the enormous estimated number of phages present on this planet<sup>2</sup>, a relatively  
59 small number of phage species have been identified and fewer have been fully characterized. But this  
60 is rapidly changing. Initiatives have been launched to both isolate new phage species and annotate the  
61 staggering amount of genomic data collected in the growing number of screening and  
62 characterization studies (the PhAnToMe project, the Marine Phage Sequencing Project, and<sup>3,4</sup> are  
63 just some examples). There are also numerous ongoing efforts to identify phages suitable for phage  
64 therapy<sup>5-8</sup>, biocontrol<sup>9,10</sup>, prevention of biofilms<sup>11-12</sup>, detection and diagnostics<sup>13-15</sup>, and as active or  
65 structural elements in biomaterials.<sup>16,17</sup> With the rapidly growing number of applications comes an  
66 increasing need for the manufacture of phages and phage products, and by extension approaches and  
67 methods to reliably assess their efficacy and quality. As the efficacy of phage products relies on the  
68 phage properties, in many ways assessment of quality is tied to phage characterization.

69 Several standardized growth-associated parameters are used to characterize phages. These  
70 include burst size (virus particles produced per infection), eclipse period (period from infection to the  
71 production of the first viable intracellular phage virion), latent period (period from infection to cell  
72 lysis), adsorption rate, adsorption efficiency, and overall growth rate or ‘phage fitness,’ to name a  
73 few. Together, these parameters all contribute to phage virulence, “the killing ability of the phage”,  
74 but there is no standardized way to report, or even a clear definition of, phage virulence itself.

75 In epidemiology, a common measurement of virulence is the reproduction number ( $R_0$ ) –  
76 defined as the average number of additional hosts that the virus will spread to after infecting a single  
77 host<sup>18</sup>. An equivalent measurement is not applicable to the virulent phage life cycle. The number of  
78 phage progeny released per infected cell is given by the burst size; when replicating in a healthy,  
79 densely growing bacterial culture, the  $R_0$  of a phage is essentially equal to its burst size. However,  
80 burst size alone is not a proper indicator of phage virulence. For example, in a study of the efficacy

81 of phage therapy, virulence was found to be an increasing function of both adsorption rate and burst  
82 size.<sup>19</sup> In fact, even more parameters are needed to fully quantify virulence; these include, amongst  
83 others, the latent period, adsorption efficiency, and host cell growth rate.<sup>20</sup> In this context, virulence  
84 can be defined as the ability of a phage to kill or damage a host population.<sup>21</sup> As pointed out by  
85 Hobbs and Abedon<sup>22</sup>, the concept of virulence is often applied to differentiate phages undergoing  
86 lytic rather than lysogenic or chronic infections. But even in the case of comparing strictly lytic  
87 phages or various clones of a strictly lytic phage, it is possible to infer different degrees of virulence,  
88 despite the inconsistencies in terminology.

89 Common techniques employed to qualitatively measure virulence are spot tests on agar plates  
90<sup>23</sup> and bacterial reduction curves.<sup>24</sup> A spot test entails spreading a small sample of a specific phage  
91 over a bacterial culture growing in a top-agar lawn. This is a quick way to test susceptibility of a  
92 bacterial strain to various phages but does not capture infection dynamics.<sup>25</sup> A bacterial reduction  
93 curve is obtained by infecting a liquid bacterial culture with phages and taking periodic optical  
94 density measurements, which will be reduced compared to those of a phage-free control. A typical  
95 virulence study consists of generating bacterial reduction curves under various conditions and  
96 qualitatively comparing which bacterial curve is ‘reduced’ the most. The advantage of this approach  
97 is that it is applicable to any phage cultivable in suspended cultures. The disadvantages are that it is  
98 time-consuming, non-standardized and only qualitative in its current incarnation. Examples of  
99 bacterial reduction curves are plentiful in the literature.<sup>24,26-34</sup> While all these experiments rely on the  
100 same principle, no standardized or quantitative method has emerged to quantify virulence or facilitate  
101 comparisons across conditions and studies.

102 In one study, four isolated phages specific to *Escherichia coli* O157:H7 were screened against  
103 hundreds of *E. coli* strains to gather host range and susceptibility data.<sup>24</sup> The protocol consisted of  
104 performing bacterial infections in 220- $\mu$ l volumes using 96-well plates. Bacterial cultures at the same  
105 optical density were inoculated with phages at initial Multiplicities of Infection (MOIs) ranging from  
106  $10^{-6}$  to  $10^2$ . Plates were incubated at 37°C for 5 hours and then visually observed for signs of cell  
107 lysis. Host cell susceptibility was then categorized based on the minimum MOI required to obtain a  
108 culture-wide lysis by visual inspection. This approach offers many improvements over the current  
109 mix of non-standardized protocols adopted by different researchers. But it has shortcomings. Firstly,  
110 it relies on visual inspection rather than a measureable property. Secondly, it fails to capture the  
111 dynamics of infection, instead relying on endpoint measurements, which can be misleading. Thirdly,  
112 it defines lytic capability in terms of susceptibility of the host rather than the phage.

113 Another study introduced the concept of comparing the areas under bacterial infection curves to  
114 non-infected bacterial growth curves was introduced as a means of evaluating the conditions at which  
115 a phage or a combination of two phages was most efficient at killing its host (infective).<sup>35</sup> Recently,  
116 Xie et al.<sup>36</sup> built on this concept to demonstrate how bacterial reduction curves performed in  
117 microplates can be used for the high throughput evaluation of host range and phage infectivity. In the  
118 study, the authors demonstrated how the comparison of the areas under the curves could be used to  
119 semi-quantify the efficacy of a phage against a given host or a range of hosts.

120 In the present study, we detail a method to measure phage virulence that overcomes the  
121 shortcomings faced by traditional methods. We build on the premise that comparisons between  
122 infected and non-infected bacterial cultures can be used to quantitatively assess the virulence of a  
123 phage or phage mixture – as demonstrated in<sup>35,36</sup>. This method generates a Virulence Index ( $V_P$ ) for a  
124 phage infecting a specific host strain under a given set of environmental conditions. The present  
125 study, which compares the virulence of phages T4, T5 and T7 under various conditions, shows the

126 Virulence Index can be used to easily compare and quantify the virulence of diverse phages. This  
127 protocol greatly simplifies and improves the reliability of virulence measurements, and provides a  
128 platform to quantitatively compare between phages and conditions.

129 The phage research community and industry require a simple, fast, and standardized way to  
130 measure quantitatively phage virulence that takes into account all factors affecting virulence. This  
131 will greatly facilitate screening, selection, comparison and quality control of phages and phage  
132 products for specific scientific, industrial or therapeutic applications. Such a method can also be used  
133 to monitor the impact of mutations or adaptation on virulence, and to establish formulations of phage  
134 cocktails for various applications.

135

## 136 **Materials and Methods**

### 137 ***Organisms and Media***

138 Cultures of *Escherichia coli* ATCC 11303 used for experimentation were grown overnight in  
139 10 ml of medium. The media used were Bacto Tryptic Soy Broth (TSB; Becton Dickinson, Sparks,  
140 MD) and BBL Brain Heart Infusion (BHI; Becton Dickinson, Sparks, MD). Host cultures were  
141 grown in 125-ml Erlenmeyer flasks containing 10 ml of medium, agitated at 150 rpm and incubated  
142 at 37°C. Phage species used were phage T4 (ATCC 11303-B4), phage T5 (ATCC 11303-B5), and  
143 phage T7 (ATCC 11303-B7). Phage stocks were stored at 4°C in TSB at titers of  $4.5 \times 10^8$  pfu/ml,  
144  $2.3 \times 10^8$  pfu/ml, and  $2.1 \times 10^8$  pfu/ml, respectively.

### 145 ***Bacterial Reduction Experiments***

146 Overnight cultures (100  $\mu$ l) were used to inoculate 10 ml of fresh medium in an Erlenmeyer  
147 flask, incubated at 37°C and 150 rpm. These cultures were allowed to grow beyond the starting  
148 bacterial concentration used for the bacterial reduction experiments ( $10^8$  cfu/ml). All bacterial  
149 reduction curves were generated using 96-well plates with 300- $\mu$ l well volumes. Phage stocks were  
150 serially diluted from a concentration of  $10^8$  pfu/ml to 10 pfu/ml in 200- $\mu$ l volumes. Plates were  
151 incubated at 37°C for 30 minutes prior to inoculation to ensure stable temperatures. Cell  
152 concentrations were adjusted to  $10^8$  cfu/ml for every experiment, unless otherwise indicated, yielding  
153 MOIs ranging from  $10^{-7}$  to 1. In this report, MOI refers to the initial MOI at the initiation of phage  
154 infection. Considering that the working volume used to generate the reduction curves was 250  $\mu$ L,  
155 MOIs lower than  $10^{-7}$  were not tested since, on average, they would have less than 1 phage per  
156 culture. A layout of the microplate used for high throughput evaluation of virulence can be seen in  
157 Fig. 1A. Four wells of phage-free bacterial cultures were included on every plate as control  
158 experiments, in addition to four media-blanks for reference. Experiments were run with all phage  
159 samples growing in parallel in a final volume of 250  $\mu$ l. Since phages are serially diluted to obtain  
160 different MOIs, this set-up can be completed rapidly with a multichannel pipetter. Optical density  
161 was measured at 630 nm with a Bio-Tek ELx800 Universal Microplate Reader and the data was  
162 recorded using KCJunior software. Optical density measurements were taken immediately after  
163 inoculation and then at regular intervals afterwards. Between samples, the plates were covered and  
164 placed in an incubator shaker at 150 rpm at the specified experimental temperature (continuous  
165 incubation and readings in an incubating plate-reader is also possible, even recommended when  
166 available). Measurements were taken until the control cultures reached stationary phase. Once all  
167 data was collected, areas underneath the optical density vs. time curves were calculated using the

168 trapezoid rule for each well, from the time of infection to the time corresponding to the onset of  
169 stationary phase in the phage-free control.

### 170 ***Evaluation of Phage Cocktails***

171 The virulence of two combinations of phages T5 and T7 (at proportional T5:T7 ratios of 1:1 and 3:1)  
172 was also assessed using the same procedure as described above, with the particularity that the MOI  
173 reported was the combined MOI of both phages. For example, when the ratio of 1:1 was tested,  $0.5 \times 10^8$   
174 pfu/ml of phage T5 and  $0.5 \times 10^8$  pfu/ml of phage T7 were used to make a total combined titer  
175 of  $1 \times 10^8$  pfu/ml, for an MOI of 1. Similarly, for the 3:1 ratio,  $0.75 \times 10^8$  pfu/ml of phage T5 and  
176  $0.25 \times 10^8$  pfu/ml of phage T7 were used for a total combined titer of  $1 \times 10^8$  pfu/ml. The use of the  
177 combined MOI is important for the assessment of virulence in comparison to results with single  
178 phages; this allows the rapid identification of synergistic or inhibitory effects between phages. In  
179 these tests, the microplate layout described in Fig. 1A was still used, where triplicates of phage  
180 cocktails occupied 3 columns. Incubation in TSB at 37°C, measurements and analysis were  
181 conducted in the same manner as for single phage testing.

### 182 ***Statistical Analysis***

183 Virulence assays for each phage species were performed in duplicate on three separate micro-  
184 well plates (n=6) or in triplicate in a single plate (n=3) for the comparison of phage cocktails. This  
185 was done so that inaccurate readings or potential contamination could be detected. Data points on  
186 graphs are shown as the average of all replicates; error bars depict the standard deviation. Errors  
187 reported for Virulence Index ( $V_P$  – defined below) values are the summation of errors in all the local  
188 virulence ( $v_i$  – defined below) values from which the  $V_P$  was determined.

189

## 190 **Results**

### 191 ***Virulence Protocol and Nomenclature***

192 The virulence measurements presented herein build on the premise of bacterial reduction  
193 curves. A set of bacterial reduction curves – performed as described in the section above – for T4  
194 infecting *E. coli* ATCC 11303 in TSB at 37°C is shown in Fig. 1B. The phage-free control exhibits a  
195 classic growth pattern. As can be seen in the other curves found in Fig. 1B, the presence of the phage  
196 can significantly reduce the presence of bacteria. By comparing the bacterial reduction curves to the  
197 control, we can quantify the reduction due to the killing or damaging of the host by the phage. This is  
198 done by comparing the integrated area of a bacterial reduction curve ( $A_i$ , where  $i$  is the MOI) to the  
199 integrated area of the phage-free control ( $A_0$ ) as shown in Fig. 1C for the MOI  $10^{-3}$ . These areas are  
200 calculated from the onset of infection (time 0) to the time of the onset of the stationary phase in the  
201 phage-free control (indicated by the vertical dashed grey line near 3h in Fig. 1C). It is important to  
202 stress how the establishment of the limit of integration plays a significant role in the assessment of  
203 virulence. This limit should be set as the onset of stationary phase in the phage-free control (at 3h in  
204 Fig. 1C). This provides a consistent reference for integration that can be easily identified for any  
205 phage-host system and restricts measurements to the period of cell growth – a necessary condition for  
206 productive infection for many phages.<sup>37</sup> Moreover, it ensures that the range of the virulence  
207 measurements is well distributed no virulence and maximum virulence, as discussed below. In  
208 general, we recommend establishing the limit of integration at the time when the slope of OD<sub>600</sub> over  
209 time reaches  $\leq 0.03 \text{ h}^{-1}$ .

210 Using the two areas calculate for the free-phage control ( $A_o$ ) and the culture infected at a given  
211 MOI ( $A_i$ ), a local virulence ( $v_i$ ), capturing the dynamics of phage infection, can be calculated for that  
212 specific MOI under a given set of conditions:

$$213 \quad v_i = 1 - \frac{A_i}{A_o} \quad (1)$$

214 where  $v_i$  reports the killing or damaging ability of the phage at a given MOI. The more virulent a  
215 phage, the faster it kills a large number of bacteria (or prevents them from growing), and the greater  
216  $v_i$ . Local virulence is measured on a scale from 0 to 1, where 0 represents the absence of virulence  
217 and 1 represents maximum theoretical virulence – instantaneous cell death. While this theoretical  
218 maximum is unlikely to be observed in the laboratory, a  $v_i$  over 0.90 is readily achievable with the  
219 appropriately lytic phage-host system.

220 Additionally, a virulence curve (Fig. 1E) can be obtained for the phage grown under a given  
221 set of environmental conditions (e.g. temperature, medium, ionic strength) by plotting local  
222 virulences calculated from Fig. 1B against  $\log MOI$  (which is easily obtained from the conversion of  
223 the MOI axis seen in Fig. 1D). This provides a powerful tool in characterizing a phage against a  
224 specific host over a large range of MOIs. Generally, the earlier  $v_i$  approaches 1 on the virulence  
225 curve, the more virulent the phage. Two important values can be gathered from such virulence curves  
226 to quantify phage virulence: the Virulence Index ( $V_P$ , where  $P$  refers to the phage species) and  $MV_{50}$   
227 (MOI required to produce a local virulence of 0.5).

228 The Virulence Index is defined as the area under the virulence curve ( $A_P$ ) divided by the  
229 theoretical maximum area under the virulence curve ( $A_{max}$ ):

$$230 \quad V_P = \frac{A_P}{A_{max}} \quad (2)$$

231 where  $A_P$  is determined by integrating the virulence curve according to:

$$232 \quad A_P = \int_{-7}^0 v_i d(\log MOI) \quad (3)$$

233 Note that  $\log MOI$  is used in the integration in order to give equal weighting to each  $v_i$  when  
234 calculating the Virulence Index. The value for  $A_{max}$  is determined by Eq. 3 under the special  
235 condition that  $v_i = 1$  for all MOIs. In this study,  $A_{max} = 7$  for all conditions tested, since the range  
236 of MOIs investigated goes from  $\log MOI = -7$  to  $\log MOI = 0$ .

237 Similarly to the local virulence, the Virulence Index is normalized such that the theoretical  
238 maximum is 1. To reach this value, instantaneous lysis of the entire bacterial culture for all MOIs  
239 tested would be required, a physical impossibility. In this study, the highest Virulence Index  
240 observed was 0.84. A Virulence Index of 0 signifies the complete absence of virulence over the range  
241 of MOIs tested.

242 From the data shown in Fig. 1D (phage T4 in TSB at 37°C) a Virulence Index of 0.6 was  
243 obtained. It was calculated as follows (integrations calculated using the trapezoid rule):

$$244 \quad A_{T4}(37^\circ\text{C}, \text{TSB}) = \int_{-7}^0 v_i d(\log MOI) = 4.2 \quad (4)$$

245  $V_{T4}(37^{\circ}\text{C}, \text{TSB}) = \frac{A_P}{A_{max}} = \frac{4.2}{7} = 0.6$  (5)

246 The final quantitative parameter given by the virulence curve is  $MV_{50}$ , an analog to  $ID_{50}$   
247 (infective dose for 50% of subjects) used in toxicology.<sup>38</sup> It is defined as follows:

248  $MV_{50} \equiv MOI|_{v_i=0.5}$  (6)

249 The  $MV_{50}$  is the MOI for which the local virulence  $v_i$  is equal to 0.5; the MOI at which the  
250 phage achieves 50% of the maximum theoretical virulence. This provides another tool for comparing  
251 phage virulence. The lower the  $MV_{50}$ , the more virulent the phage. The  $MV_{50}$  can be found through  
252 inspection of the virulence curve. As an example, the  $MV_{50}$  for phage T4 at 37°C in TSB obtained  
253 from Fig. 1D is:

254  $MV_{50}(T4, 37^{\circ}\text{C}, \text{TSB}) \equiv MOI|_{v_i=0.5} = 4 \times 10^{-5}$  (7)

255 Note that the  $MV_{50}$  should be reported to only one significant figure due to the intrinsic error in the  
256 virulence curve. This measure is meant as a means of comparison of the order of magnitude of  
257 virulence.

## 258 **Comparison of Virulence**

259 Bacterial reduction curves and their corresponding virulence curves are shown for phages T5  
260 (Fig. 2A and 2B) and T7 (Fig. 2C and 2D) in TSB at 37°C.

261 Phage T5 was the least virulent phage studied (Fig. 2B). In contrast to the bacterial reduction  
262 curves exhibited by phage T4 (Fig. 1D) and phage T7 (Fig. 2D), phage T5 only began to show  
263 measurable virulence at MOIs  $\geq 10^{-2}$ . For all MOIs below this threshold, the values of local  
264 virulence observed were 0 (Fig. 2A). Although being noticeable only from an MOI of  $10^{-2}$ , the local  
265 virulence increased rapidly, peaking at 0.8 at an MOI of 1. Accordingly, the Virulence Index  
266 measured for T5 under the conditions tested was  $V_{T5}(37^{\circ}\text{C}, \text{TSB}) = 0.17$ .

267 Phage T7 was the most virulent phage tested under these conditions and yielded a Virulence  
268 Index of 0.84 (from Fig. 2D). The remarkably virulent nature of this phage is observed qualitatively  
269 in the bacterial reduction curves (Fig. 2C). At MOIs ranging from 1 to  $10^{-3}$ , culture-wide lysis was  
270 achieved within 1 h. Even at the lowest MOI tested ( $10^{-7}$ ) culture-wide lysis was observed after 2.5 h;  
271 whereas the phage-free control grew to stationary phase in 3 h (Fig. 2C).

272 While the virulence curves can be used to quickly and effectively compare different phages,  
273 mutants or progeny, they also provide excellent visual tools for analysis and comparison of how a  
274 phage behaves under a set of conditions. For example, Fig. 3 compares the virulence curves for  
275 phages T4, T5, and T7 in different environmental conditions. It is clear from these curves that  
276 temperature (Fig. 3A vs. 3B) and media composition (Fig. 3B vs. 3C) significantly impact phage  
277 virulence. Importantly, the same range of MOIs must be used when comparing virulence across  
278 different phage species or conditions. If virulence measurements were limited to MOIs ranging from  
279  $10^{-2}$  to 1, inspection of Fig. 3C would lead one to conclude that phages T4 and T7 have very similar  
280 behaviours. However, inspection of the entire experimental range demonstrates significant  
281 differences in the virulence between these phages.

282 Table 1 displays the Virulence Index ( $V_P$ ) and  $MV_{50}$  values for phages T4, T5, and T7 in two  
283 different media (TSB and BHI) at two different temperatures (30°C and 37°C). The data



284 demonstrates the full spectrum of virulence, from the limited virulence of phage T5 in BHI at 37°C  
285 ( $V_{T5} = 0.05$ ,  $MV_{50} > 1$ ) to the exceptional virulence of T7 in TSB at 37°C ( $V_{T7} = 0.84$ ,  $MV_{50} <$   
286  $10^{-7}$ ). Together the Virulence Index and the  $MV_{50}$  values provide a framework for assessing the  
287 virulence of a phage and for comparing phage virulence across species and conditions.

288 Using the values calculated for phages T4, T5, and T7, it is a straightforward task to identify  
289 the relative virulence of each phage. Phage T7 had the highest virulence values and lowest  $MV_{50}$   
290 values in all conditions tested. Phage T5 consistently had the lowest virulence and highest  $MV_{50}$   
291 values. The effect of media conditions on virulence is also apparent. For all phages, BHI unfailingly  
292 resulted in lower virulence values. However, the effect of temperature, over the admittedly narrow  
293 range tested, was more muted. For phage T4, no significant effect of temperature on virulence was  
294 seen between 30°C and 37°C. For T7, virulence increased with temperature, while it decreased for  
295 T5.

### 296 *Evaluation of combinations of phages*

297 Similarly, the virulence curves for the mixtures of phages T5 and T7 provide information on  
298 the performance of combinations of phages or of phage cocktails. As can be observed in Figure 4, the  
299 reduction curves of the combinations of phages (ratios of phage T5 to T7 of 1:1 and 3:1) demonstrate  
300 a killing potential between those of the single phages, with the 1:1 ratio showing more virulence.  
301 This is also observed in the resulting values of virulence index (0.81 and 0.72, respectively) and  
302  $MV_{50}$  ( $5 \times 10^{-6}$  and  $1 \times 10^{-6}$ , respectively). It is interesting to note that the Virulence Indexes obtained  
303 are not proportional to the relative initial abundance of each phage in the cocktail. This is consistent  
304 with the fact that, in the absence of interference or inhibition between them, the contributions of  
305 individual phages in a cocktail depend on their individual infection kinetic parameters.

306

### 307 **Discussion**

308 Unlike most other biologics, phages are intrinsically dynamic in nature, be it through mutations  
309 <sup>39-43</sup> or phenotypic traits.<sup>43-46</sup> In addition, infections are influenced by many factors, some correlated,  
310 others orthogonal, but all affecting infection dynamics. The evaluation of single parameters (e.g. titer,  
311 burst size, efficacy of plating, etc.) is not sufficient. Generally, individual phage characteristics are  
312 measured and discussed in relation to how they affect virulence.<sup>19,40,47</sup> For example, faster adsorption  
313 rates, larger burst sizes, and shorter latent periods are all conditions observed to increase phage  
314 virulence. But there is no current way of relating these parameters or weighing their individual or  
315 combined input towards an overall phage virulence. Hence, the characterization of phages, the  
316 evaluation of their efficacy and quality control through the manufacturing process all require a  
317 different approach, one that encompasses the effects of all factors influencing virulence.

318 As mentioned above, researchers have been using qualitative observations of bacterial  
319 reduction curves to describe phage virulence for many years. In fact, groups have proposed a cell  
320 susceptibility scale based on visual observations of the bacterial reduction curve<sup>24</sup> and a primary  
321 comparison of the area under reduction curves.<sup>35,36</sup> The Virulence Index and  $MV_{50}$  measurements  
322 forego these limitations and enable direct, quantitative comparisons of phage virulence,  
323 compounding all the parameters affecting it.

324 The local virulence and Virulence Index are valuable tools for screening new phage isolates  
325 and comparing phages for specific applications. Consider the case of the bacterial reduction curve for

326 phage T7 at an MOI of  $10^{-7}$  (Fig. 2C). It achieved a local virulence value of  $v_{10^{-7}} = 0.62$ , and  
327 complete lysis of the culture occurred within 2 hours; astonishingly fast considering such a low MOI.  
328 In fact, the virulence curve (Fig. 2D) begins at this value and increases steadily before stabilizing  
329 above 0.9 for MOIs  $\geq 10^{-3}$ . Therefore, for T7, the  $MV_{50}$  is less than  $10^{-7}$ . In contrast, for phage T5  
330 under the same conditions, the  $MV_{50}$  was  $10^{-1}$  – over 6 orders of magnitude larger than for phage T7.  
331 In order to achieve the same lytic capability as one phage T7, more than 1 million phage T5 virions  
332 are required at the onset of infection.

333 An important consideration when comparing local virulence, Virulence Index, and  $MV_{50}$   
334 values among various phages and/or conditions is that these parameters are indirect measurements of  
335 infection dynamics. Since they are calculated based on the relationship between infected cultures and  
336 the growth of the host, they serve as quantitative descriptors of the effect of phages on cell cultures.  
337 They are impacted by all the environmental and physiological factors influencing the host and/or  
338 phage growth and propagation rates. Thus even if infections may be slower at one set of conditions  
339 compared to another (due to slower adsorption rates, longer lysis times, or smaller burst sizes), if the  
340 growth of the host is also slowed down by the same magnitude, the virulence may remain the same.  
341 This is a powerful aspect of these measurements: they reflect kinetics without being impeded by  
342 them.

343 Phage virulence is thus affected by a large number of environmental and physiological  
344 parameters. For example, conditions such as temperature, pH, media composition, and aeration can  
345 all affect both host cell growth rate – influencing phage growth-associated parameters such as burst  
346 size and latent period – and phage adsorption rate – affecting the rate of infection.<sup>37</sup> Moreover, phage  
347 infections at the population level can exhibit characteristics not easily observed in individual host-  
348 phage interactions (e.g. lysis inhibition in the case of T4). All these interacting variables contribute to  
349 virulence. A recent study testing the efficacy of six newly isolated phages to treat *Pseudomonas*  
350 *aeruginosa* infection of *Drosophila melanogaster* found no correlation between burst size, adsorption  
351 rate, or latent period and phage therapy efficacy.<sup>47</sup> The only phage parameter found to correlate  
352 significantly with treatment efficacy was phage growth rate – implying that a measurement of phage  
353 virulence needs to account for contributions of all the disparate factors working together.

354 With the introduction of the Virulence Index, there now exists a metric which can be used to  
355 quantify the pooled contribution of each of these variables on overall phage virulence. Which  
356 features of phages T4, T5 and T7 lead to such significant differences in virulence when infecting *E.*  
357 *coli* in TSB? Phage T4 has a very high adsorption rate and adsorption efficiency in TSB<sup>48</sup>, while T5  
358 and T7 both have similar adsorption rates with poor adsorption efficiencies in the same medium.<sup>49</sup>  
359 Perhaps this poor adsorption efficiency is a major reason why T5 displays limited virulence in TSB.  
360 Yet, T7, which has even lower adsorption efficiency, is extremely virulent. In this case, the latent  
361 period and/or burst size may be the deciding factors. While not measured in these experiments, T7 is  
362 reported to exhibit latent periods of less than 20 minutes while T5's latent period can exceed 40  
363 minutes.<sup>50</sup> Note that the relative importance of each of these parameters in determining virulence may  
364 also be influenced by the bacterial cell density. The virulence curve can be used in conjunction with  
365 traditional measurements of phage growth kinetics to determine the contribution each phage growth  
366 parameter has on overall phage virulence.

367 In addition, as highlighted by many studies<sup>51-54</sup>, the formulation of phage cocktails is crucial  
368 to the success of many phage-based treatments and technologies. Considering most cocktails are  
369 composed of more than two phages, proper optimization studies require testing vast numbers of  
370 possible formulations, which can be difficult and time-consuming. Hence, it would be most practical

371 to perform a large number of comparisons at a given MOI on a single multi-plate; essentially  
372 comparing the values of local virulence ( $v_l$ ) for various combinations of phages. In this case, the  
373 whole multi-plate layout could be modified to have various formulations all at the same MOI (rather  
374 than the range of MOIs described and shown in Fig. 1). On the other hand, the Virulence Index and  
375 the shape of the virulence curve (Fig. 4) can also be used to further understand some of the  
376 interactions between the individual phages making up the cocktail. For example, to see if the  
377 presence of a phage in the cocktail impedes on the overall virulence.

378

## 379 **Conclusion**

380 The developed methodology will facilitate and standardize the important screening steps used  
381 in selecting a phage for specific applications. It can also be used to benchmark different phages or  
382 production batches for consistency and quality control purposes, or serve as a reliable comparison  
383 platform in the elaboration of formulation of phage cocktails. Finally, it can easily be integrated in  
384 high throughput strategies, a non-negligible factor as phage isolation and screening efforts are rapidly  
385 expanding.

386

## 387 **Acknowledgements**

388 Funding for this research was provided by the Natural Sciences and Engineering Research Council of  
389 Canada, Alberta Innovates Technology Futures and the University of Alberta Research Experience  
390 program. Special thanks to Melissa Harrison who performed the assays for the combinations of T5-  
391 T7.

392

## 393 **Authorship Confirmation Statement**

394 ZS and DS designed experiments. ZS, MRT, and KM performed experiments and analyzed data. ZS,  
395 MRT, and DS developed virulence metrics. ZS, MRT, and DS wrote the manuscript.

396

## 397 **Author Disclosure Statement**

398 No competing financial interests exist.

399

## 400 **References**

401 [1] Ptashne M. *A genetic switch: phage lambda revisited*. Cold Spring Harbor: Cold Spring Harbor  
402 Laboratory Press; 2004.

403 [2] Abedon ST. (Ed.) *Bacteriophage Ecology: Population Growth, Evolution, and Impact of*  
404 *Bacterial Viruses*. Cambridge, UK: Cambridge University Press; 2008.

- 404 [3] Hatfull GF. Dark matter of the biosphere: the amazing world of bacteriophage diversity. *J. Virol.*  
405 2015;89:8107-8110.
- 406 [4] Hatfull GF. Innovations in undergraduate science education: going viral. *J. Virol.* 2015; 89:8111-  
407 8113.
- 408 [5] Merabishvili M, Pirnay JP, Verbeken G et al. Quality-controlled small-scale production of a well-  
409 defined bacteriophage cocktail for use in human clinical trials. *Plos One* 2009;4:e4944.
- 410 [6] Rhoads DD, Wolcott RD, Kuskowski MA, et al. Bacteriophage therapy of venous leg ulcers in  
411 humans: results of a phase I safety trial. *J. Wound Care* 2009;18:237-243.
- 412 [7] Pirnay JP, De Vos D, Verbeken G, et al. The phage therapy paradigm: pret-a-porter or sur-  
413 mesure? *Pharm. Res.* 2011;28:934-937.
- 414 [8] Pirnay JP, Verbeken G, Rose T, et al. Introducing yesterday's phage therapy in today's medicine.  
415 *Future Virol.* 2012;7:379-390.
- 416 [9] Jones JB, Jackson LE, Balogh B, et al. Bacteriophages for plant disease control. *Annu. Rev.*  
417 *Phytopathol.* 2007;45:245-262.
- 418 [10] Mahony J, McAuliffe O, Ross RP, et al. Bacteriophages as biocontrol agents of food pathogens.  
419 *Curr. Opin. Biotech.* 2011;22:157-163.
- 420 [11] Lu TK, Collins JJ. Dispersing biofilms with engineered enzymatic bacteriophage. *P. Natl. Acad.*  
421 *Sci. USA* 2007;104:11197-11202.
- 422 [12] Carson L, Gorman SP, Gilmore BF. The use of lytic bacteriophages in the prevention and  
423 eradication of biofilms of *Proteus mirabilis* and *Escherichia coli*. *FEMS Immunol. Med. Mic.*  
424 2010;59:447-455.
- 425 [13] Huang S, Yang H, Lakshmanan RS, et al. The effect of salt and phage concentrations on the  
426 binding sensitivity of magnetoelastic biosensors for *Bacillus anthracis* detection. *Biotechnol.*  
427 *Bioeng.* 2008;101:1014-1021.
- 428 [14] Tawil N, Sacher E, Mandeville R, et al. Surface plasmon resonance detection of *E. coli* and  
429 methicillin-resistant *S. aureus* using bacteriophages. *Biosens. Bioelectron.* 2012;37:24-29.
- 430 [15] Singh A, Poshtiban S, Evoy S. Recent advances in bacteriophage based biosensors for food-  
431 borne pathogen detection. *Sensors (Basel)* 2013;13:1763-1786.
- 432 [16] Dang X, Yi H, Ham MH, et al. Virus-templated self-assembled single-walled carbon nanotubes  
433 for highly efficient electron collection in photovoltaic devices. *Nat. Nanotech.* 2011;6:377-384.
- 434 [17] Pearson HA, Sahukhal GS, Elasri MO, et al. Phage-bacterium war on polymeric surfaces: can  
435 surface-anchored bacteriophages eliminate microbial infections? *Biomacromol.* 2013;14:1257-  
436 1261.
- 437 [18] Dietz K. The estimation of the basic reproduction number for infectious diseases. *Stat. Meth.*  
438 *Med. Res.* 1993;2:23-41.

- 439 [19] Levin BR, Bull JJ. Phage therapy revisited: The population biology of a bacterial infection and  
440 its treatment with bacteriophage and antibiotics. *Am. Nat.* 1996;147:881-898.
- 441 [20] Santos SB, Carvalho C, Azeredo J, et al. Population dynamics of a *Salmonella* lytic phage and  
442 its host: implications of the host bacterial growth rate in modelling. *Plos One* 2014;9:e102507.
- 443 [21] Smith HW, Huggins MB, Shaw KM. The control of experimental *Escherichia coli* diarrhoea in  
444 calves by means of bacteriophages. *J. Gen. Microbiol.* 1987;133:1111–1126.
- 445 [22] Hobbs Z, Abedon ST. Diversity of phage infection types and associated terminology: the  
446 problem with ‘Lytic or Lysogenic’. *FEMS Microbiol. Lett.* 2016;363:fnw047.
- 447 [23] Kutter E. Phage host range and efficiency of plating, in: Clokie, M.R.J., Kropinski, A.M. (Eds.),  
448 *Bacteriophages: Methods and Protocols* New York, NY: Humana Press; 2009.
- 449 [24] Niu YD, Johnson RP, Xu Y, et al. Host range and lytic capability of four bacteriophages against  
450 bovine and clinical human isolates of Shiga toxin-producing *Escherichia coli* O157:H7. *J. Appl.*  
451 *Microbiol.* 2009;107:646-656.
- 452 [25] Kropinski AM, Waddell T, Meng J, et al. The host-range, genomics and proteomics of  
453 *Escherichia coli* O157:H7 bacteriophage rV5. *Viol. J.* 2013;10:76.
- 454 [26] Raya RR, Varey P, Oot RA, et al. Isolation and characterization of a new T-even bacteriophage,  
455 CEV1, and determination of its potential to reduce *Escherichia coli* O157:H7 levels in sheep.  
456 *Appl. Environ. Microbiol.* 2006;72:6405-6410.
- 457 [27] Vandersteegen K, Mattheus W, Ceysens PJ, et al. Microbiological and molecular assessment of  
458 bacteriophage ISP for the control of *Staphylococcus aureus*. *Plos One* 2011;6:e24418.
- 459 [28] Niu YD, Stanford K, Ackermann HW, et al. Characterization of 4 T1-like lytic bacteriophages  
460 that lyse Shiga-toxin *Escherichia coli* O157:H7. *Can. J. Microbiol.* 2012;58:923-927.
- 461 [29] Niu YD, Stanford K, Kropinski AM, et al. Genomic, proteomic and physiological  
462 characterization of a T5-like bacteriophage for control of Shiga toxin-producing *Escherichia coli*  
463 O157:H7. *Plos One* 2012;7:e34585.
- 464 [30] Vandersteegen K, Kropinski AM, Nash JH, et al. Romulus and Remus, two phage isolates  
465 representing a distinct clade within the Twortlikevirus genus, display suitable properties for phage  
466 therapy applications. *J. Virol.* 2013;87:3237-3247.
- 467 [31] Chaudhry WN, Haq IU, Andleeb S, et al. Characterization of a virulent bacteriophage LK1  
468 specific for *Citrobacter freundii* isolated from sewage water. *J. Basic Microbiol.* 2014;54:531-  
469 541.
- 470 [32] Niu YD, McAllister TA, Nash JH, et al. Four *Escherichia coli* O157:H7 phages: a new  
471 bacteriophage genus and taxonomic classification of T1-like phages. *Plos One* 2014;9:e100426.
- 472 [33] Saussereau E, Vachier I, Chiron R, et al. Effectiveness of bacteriophages in the sputum of cystic  
473 fibrosis patients. *Clin. Microbiol. Infect.* 2014;20:O983-990.

- 474 [34] Wong CL, Sieo CC, Tan WS, et al. Evaluation of a lytic bacteriophage, Phi st1, for biocontrol of  
475 *Salmonella enterica* serovar Typhimurium in chickens. *Int. J. Food Microbiol.* 2014;172:92-101.
- 476 [35] Bertozzi Silva J, Sauvageau D. Bacteriophages as antimicrobial agents against bacterial  
477 contaminants in yeast fermentation processes. *Biotech. Biofuels* 2014;7:123.
- 478 [36] Xie Y, Wahab L, Gill JJ. Development and validation of a microtiter plate-based assay for  
479 determination of bacteriophage host range and virulence. *Viruses* 2018;10:189.
- 480 [37] Adams MH. *Bacteriophages*. New York , NY: Interscience Publishers; 1959.
- 481 [38] Kato T, Kurashige S, Chabbert YA, et al. Determination of the ID50 values of antibacterial  
482 agents in agar. *J. Antibiot.* 1978;31:1299-1303.
- 483 [39] Josslin R. The lysis mechanism of phage T4: Mutants affecting lysis. *Virology.* 1970;40:719-  
484 726.
- 485 [40] Daniels LL, Wais AC. Virulence in phage populations infecting *Halobacterium cutirubrum*.  
486 *FEMS Microbiol. Ecol.* 1998;25.
- 487 [41] Bronson MJ, Levine M. Virulent mutants of phage P22: II. Physiological analysis of P22 virB-3  
488 and its component mutations. *Virology* 1972; 47:644-655.
- 489 [42] Storms ZJ, Sauvageau D. Evidence that the heterogeneity of a T4 population is the result of  
490 heritable traits. *PLoSone* 2014;9:e116235.
- 491 [43] Ceysens P-J, Glonti T, Kropinski AM, et al. Phenotypic and genotypic variations within a  
492 single bacteriophage species. *Virol. J.* 2011;8:134.
- 493 [44] Abedon ST. Communication among phages, bacteria, and soil environments. In: Witzany G.  
494 (Ed.), *Biocommunication in Soil Microorganisms, Soil Biology* Vol. 23. Berlin, Germany:  
495 Springer; 2011:37-65.
- 496 [45] Maxwell CS. Hypothesis: A plastically-produced phenotype predicts host specialization and can  
497 precede subsequent mutations in bacteriophage. *bioRxiv* 2018;doi:10.1101/411983.
- 498 [46] Pagliarini S, Korobeinikov A. A mathematical model of marine bacteriophage evolution. *R. Soc.*  
499 *Open Sci.*, 2018;5:171661.
- 500 [47] Lindberg H, McKean KA, Wang IN. Phage fitness may help predict phage therapy efficacy.  
501 *Bacteriophage* 2014;4:e964081.
- 502 [48] Storms ZJ, Arsenault E, Sauvageau D, et al. Bacteriophage adsorption efficiency and its effect  
503 on amplification. *Bioproc. Biosys. Eng.* 2010;33:823-831.
- 504 [49] Storms ZJ, Smith L, Sauvageau D, et al. Modeling bacteriophage attachment using adsorption  
505 efficiency. *Biochem. Eng. J.* 2012;64:22-29.
- 506 [50] Foster RA, Johnson FH. Influence of urethane and of hydrostatic pressure on the growth of  
507 bacteriophages T2, T5, T6, and T7. *J. Gen. Physiol.* 1951;34:529-550.

- 508 [51] Mendes JJ, Leandro C, Mottola C, et al. *In vitro* design of a novel lytic bacteriophage cocktail  
509 with therapeutic potential against organisms causing diabetic foot infections. *J. Med. Microbiol.*  
510 2014;63:1055-1065.
- 511 [52] Malik DJ, Sokolov IJ, Vinner GK, et al. Formulation, stabilization and encapsulation of  
512 bacteriophage for phage therapy. *Adv. Coll. Interf. Sci.* 2017;249:100-133.
- 513 [53] Forti F, Roach DR, Cafora M, et al. Design of a broad-range bacteriophage cocktail that reduces  
514 *Pseudomonas aeruginosa* biofilms and treats acute infections in two animal models. *Antimicrob.*  
515 *Agents. Chemother.* 2018;62:e02573-17.
- 516 [54] Cooper CJ, Koonjan S, Nilsson AS. Enhancing whole phage therapy and their derived  
517 antimicrobial enzymes through complex formulation. *Pharmaceuticals*, 2018;11:34.
- 518

## TABLE

**Table 1:** Virulence and  $MV_{50}$  values for phages T4, T5, T7, and combinations of phages T5 and T7 under various conditions.

| Phage                  | Virulence Index ( $V_P$ ) |        |       |       | $MV_{50}$          |                    |                    |                    |
|------------------------|---------------------------|--------|-------|-------|--------------------|--------------------|--------------------|--------------------|
|                        | 30° C                     |        | 37° C |       | 30° C              |                    | 37° C              |                    |
|                        | TSB                       | BHI    | TSB   | BHI   | TSB                | BHI                | TSB                | BHI                |
| T4                     | 0.55                      | 0.45   | 0.60  | 0.47  | $1 \times 10^{-4}$ | $1 \times 10^{-3}$ | $4 \times 10^{-5}$ | $6 \times 10^{-4}$ |
| T5                     | 0.28                      | 0.05   | 0.17  | 0.01± | $5 \times 10^{-1}$ | > 1                | $1 \times 10^{-1}$ | > 1                |
| T7                     | 0.77                      | 0.69 ± | 0.84  | 0.76  | $8 \times 10^{-7}$ | $6 \times 10^{-7}$ | $< 10^{-7}$        | $4 \times 10^{-6}$ |
| T5:T7 <sub>(1:1)</sub> | -                         | -      | 0.81  | -     | -                  | -                  | $5 \times 10^{-6}$ | -                  |
| T5:T7 <sub>(3:1)</sub> | -                         | -      | 0.72  | -     | -                  | -                  | $1 \times 10^{-6}$ | -                  |



## 1 **FIGURE LEGENDS**

2

### 3 **Figure legends**

4 **Figure 1. A)** Layout of multi-plate for high throughput evaluation of virulence. Column 1 is used for  
5 controls: green wells for phage-free cultures, gray wells for media blanks. Each column is used to test  
6 a different phage. Rows indicate different initial MOIs, from 1 (row A) to  $10^{-7}$  (row H). **B)** Bacterial  
7 reduction curves for phage T4 infecting *E. coli* 11303 in TSB at 37°C. **C)** Growth curve of phage-  
8 free control and bacterial reduction curve at MOI  $10^{-3}$  (extracted from B). The dashed vertical line  
9 indicates the limit of integration. **D)** Virulence curve generated from bacterial reduction curves of  
10 phage T4 growing in TSB at 37°C. Each individual data point represents the local virulence ( $v_i$ ) at  
11 the corresponding MOI. Dotted line highlights MV50 determination. **E)** Virulence curve from D)  
12 with x-axis converted to  $\log_{10}(\text{MOI})$ . Error bars depict the standard deviation of six replicates.

13

14 **Figure 2. A)** Bacterial reduction curves and **B)** corresponding virulence curve for phage T5 infecting  
15 *E. coli* 11303 in TSB at 37°C. **C)** Bacterial reduction curves and **D)** corresponding virulence curve  
16 for phage T7 infecting *E. coli* 11303 in TSB at 37°C. Error bars depict the standard deviation of six  
17 replicates.

18

19 **Figure 3.** Virulence curves of phages T4, T5, and T7 in **A)** BHI at 30°C, **B)** BHI at 37°C, and **C)** in  
20 TSB at 37°C. Error bars depict the standard deviation of six replicates.

21

22 **Figure 4.** Virulence curves of phages T5 (diamonds), T7 (squares), and combinations of phage T5  
23 and T7 (3:1, circles; 1:1, triangles) in TSB at 37°C. Error bars depict the standard deviation of  
24 triplicates.

25

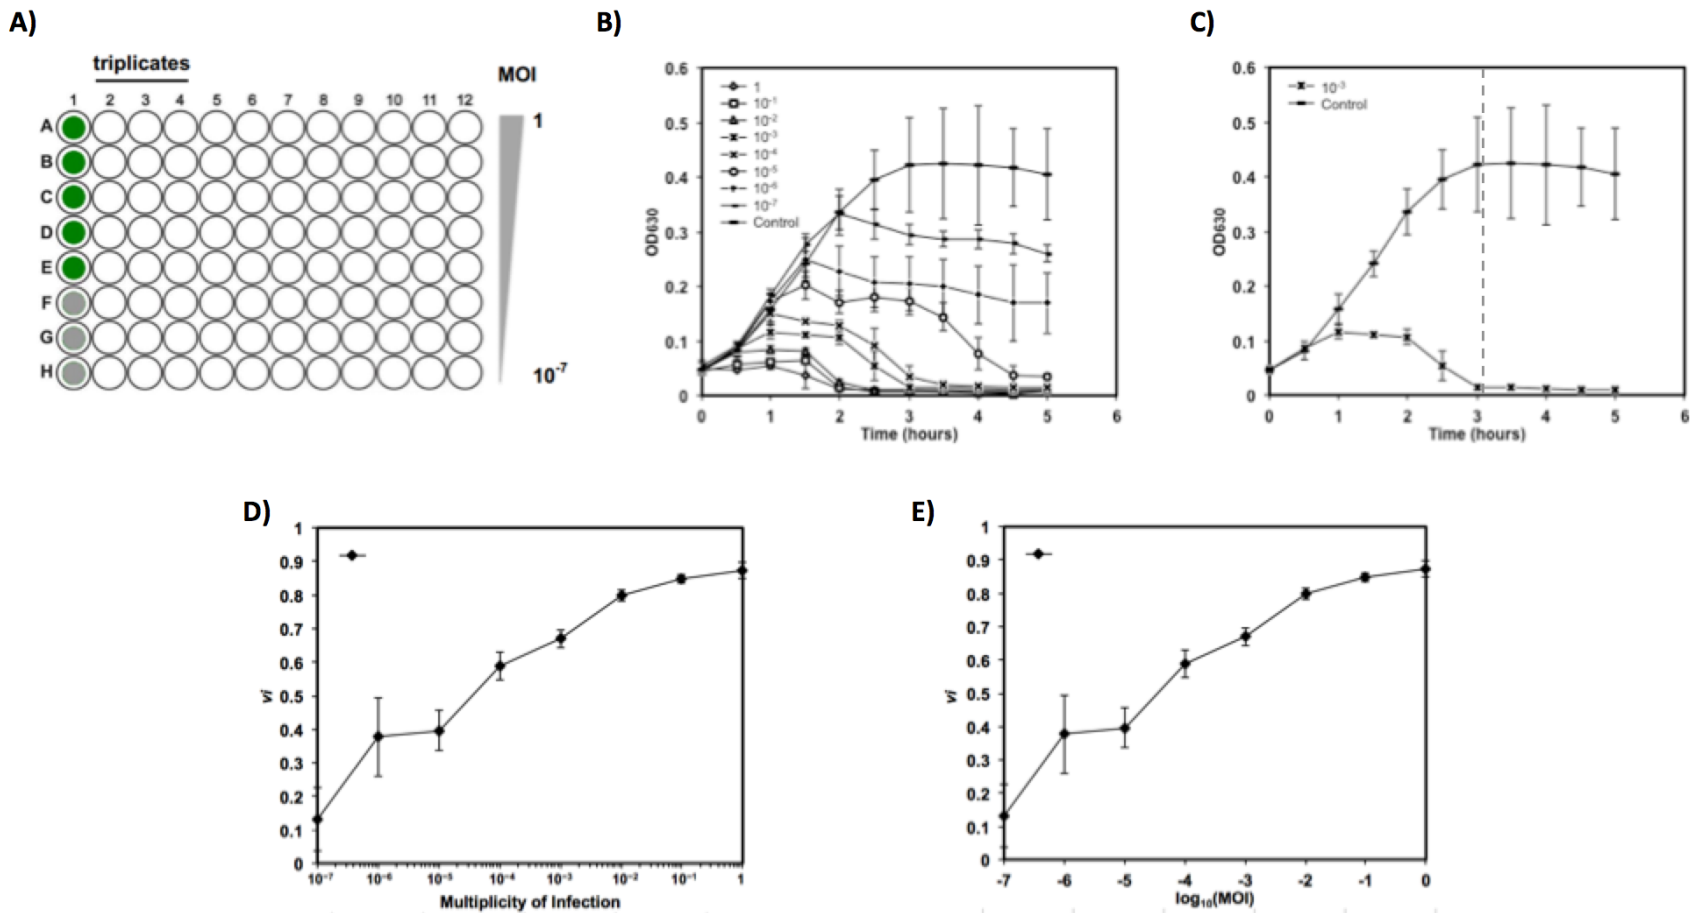

**FIGURE 1**

A)

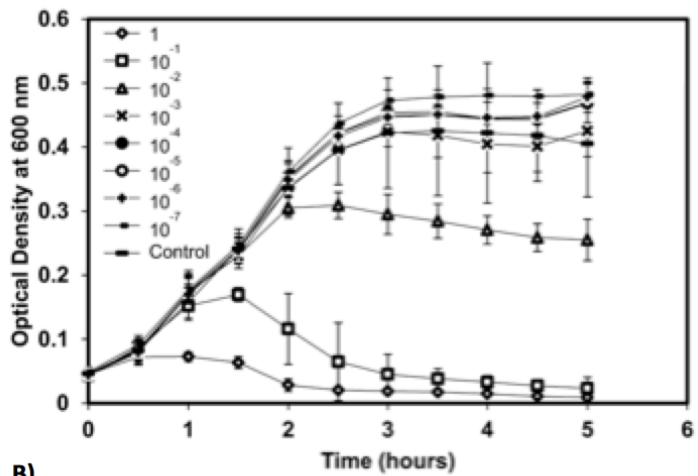

B)

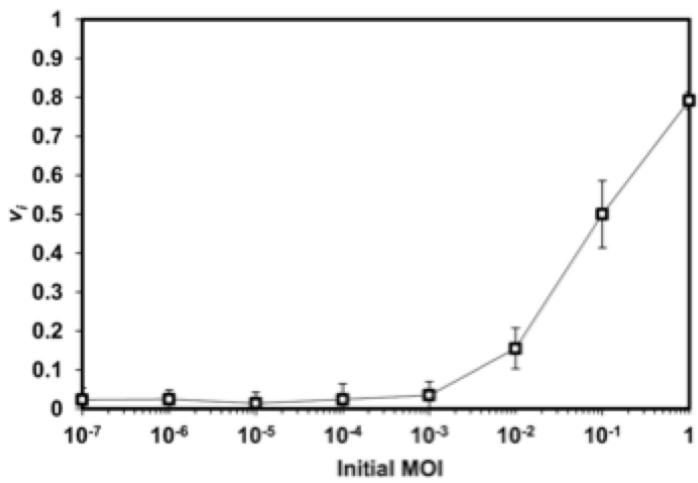

C)

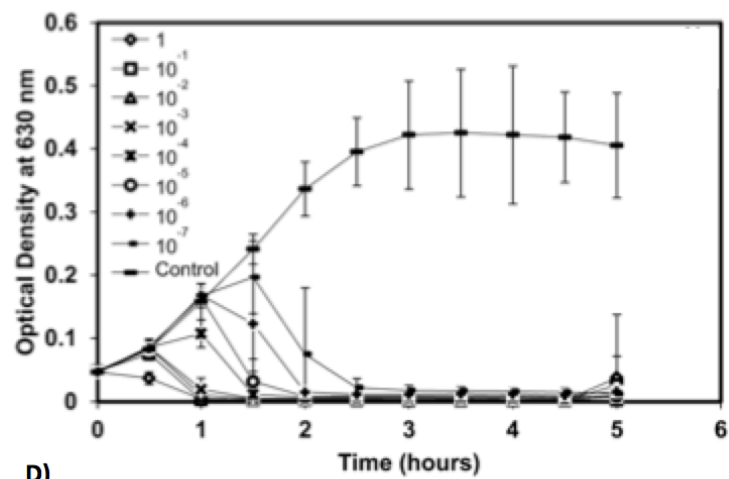

D)

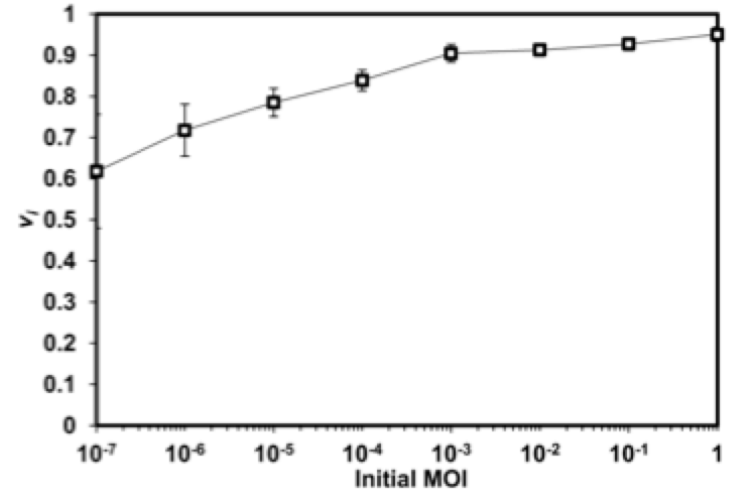

FIGURE 2

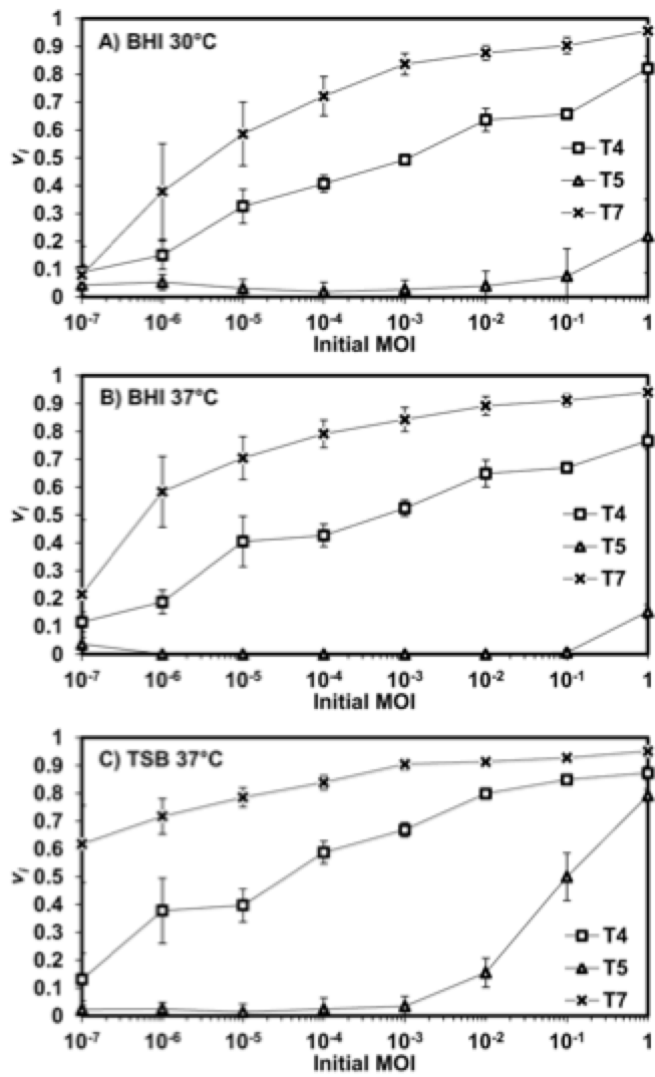

FIGURE 3

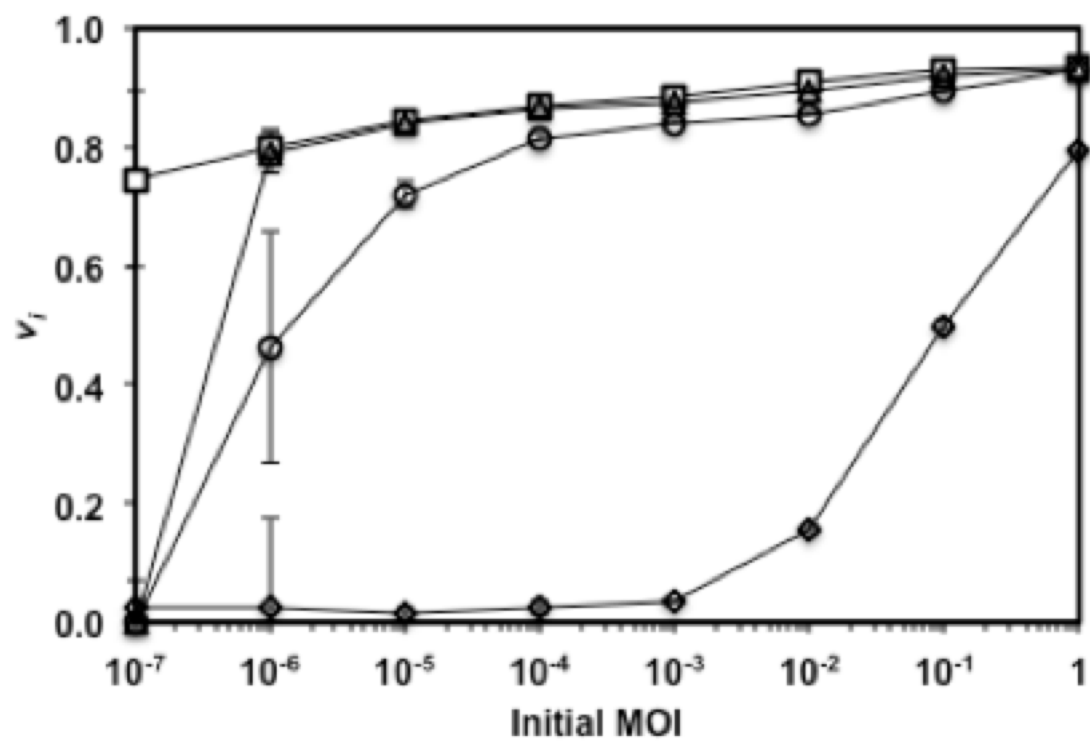

FIGURE 4
